# Supplementary material for: Nature of cyanoargentate bridges defining spin crossover in new 2D Hofmann clathrate analogues
Source: Royal Society of Chemistry journal article supplement (doi:10.1039/d3dt04372j), 2024-01-01
Supplement: d3dt04372j1.pdf [file d3dt04372j1.pdf]

## Supporting Information

### Nature of cyanoargentate bridge defining spin crossover in new 2D Hofmann clathrate analogues

Valerii Y. Sirenko,<sup>a</sup> Olesia I. Kucheriv,<sup>a</sup> Sergiu Shova,<sup>b</sup> Sergii I. Shylin,<sup>c</sup> Vadim Ksenofontov,<sup>d</sup> Igor O. Fritsky,<sup>a,e</sup> Wolfgang Tremel<sup>d</sup> and Il'ya A. Gural'skiy\*<sup>a</sup>

<sup>a</sup> Department of Chemistry, Taras Shevchenko National University of Kyiv, 64 Volodymyrska St., 01601 Kyiv, Ukraine. E-mail: illia.guralskiy@univ.kiev.ua

<sup>b</sup> Department of Inorganic Polymers, "Petru Poni" Institute of Macromolecular Chemistry, 41A Aleea Gr. Ghica Voda, 700487 Iasi, Romania

<sup>c</sup> Ångström Laboratory, Department of Chemistry, Uppsala University, 75120 Uppsala, Sweden

<sup>d</sup> Institute of Inorganic and Analytical Chemistry, Johannes Gutenberg University of Mainz, 55128 Mainz, Germany

<sup>e</sup> Innovation development center ABN, 2/37 Pirogov St., 01030 Kyiv, Ukraine

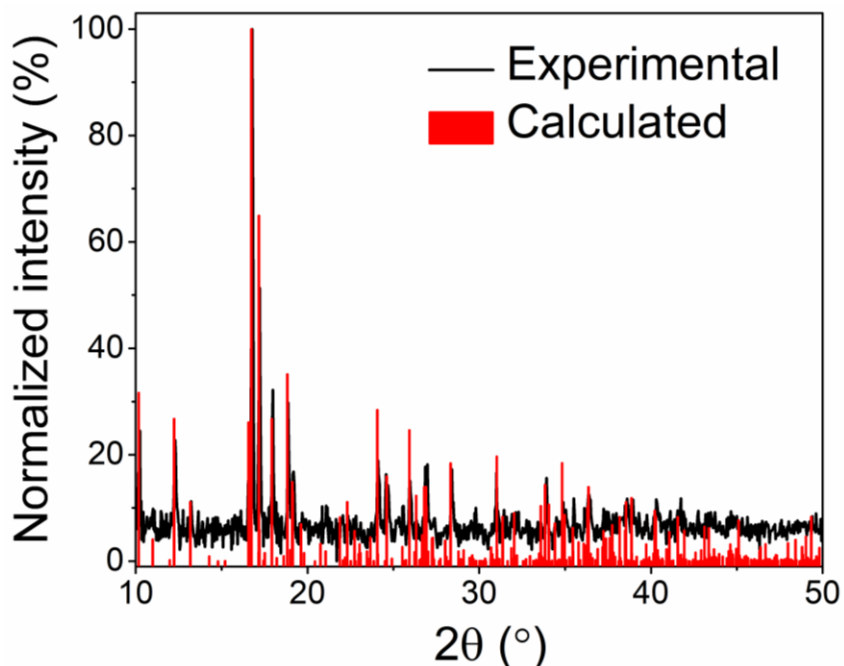

**Figure S1.** Experimental (black line) and calculated (red column) PXRD patterns of **1** in the HS state

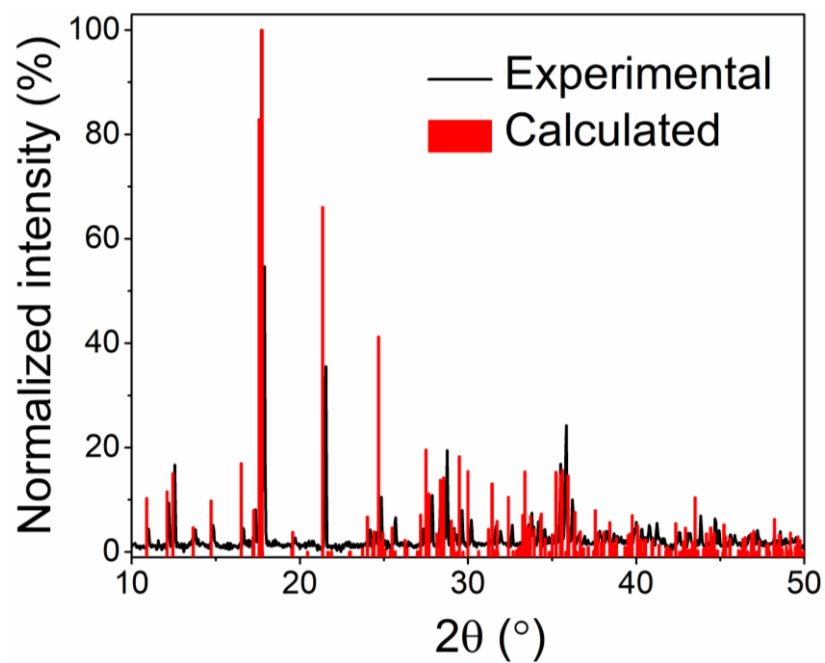

**Figure S2.** Experimental (black line) and calculated (red column) PXRD patterns of **2** in the HS state

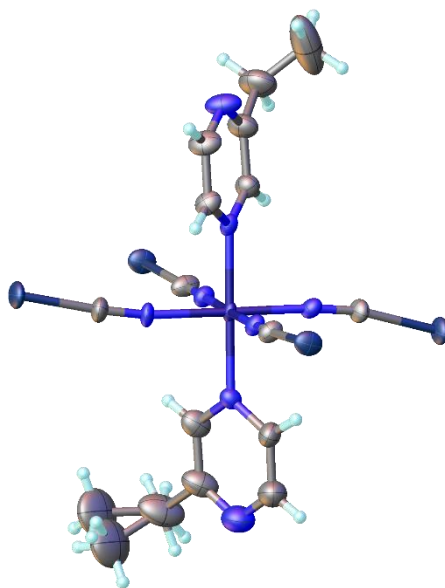

**Figure S3.** Illustration of Etpz disorder in **1**.

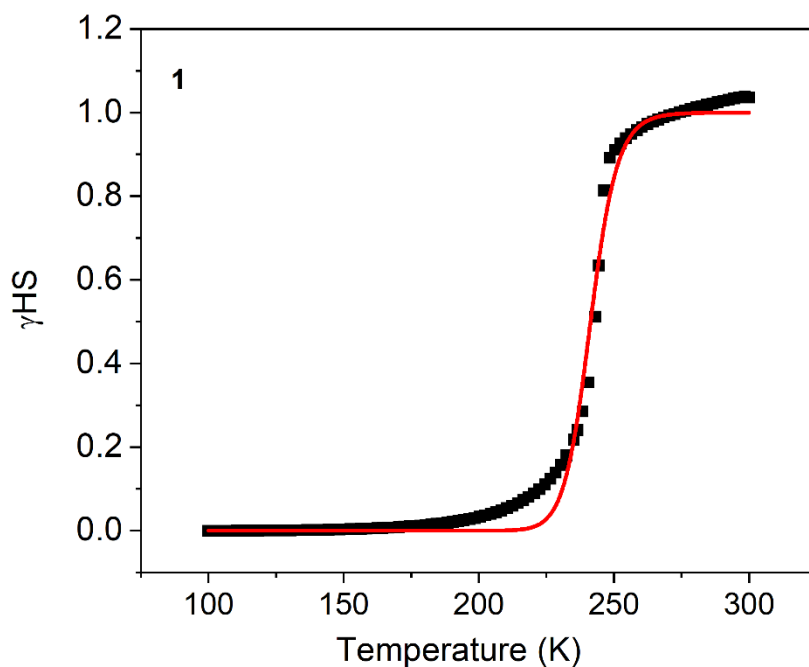

**Figure S4.** Heating curve of **1** obtained from a fit of magnetic susceptibility to the domain model. The calculations indicate the presence of  $\sim 10$  SCO centers per domain.

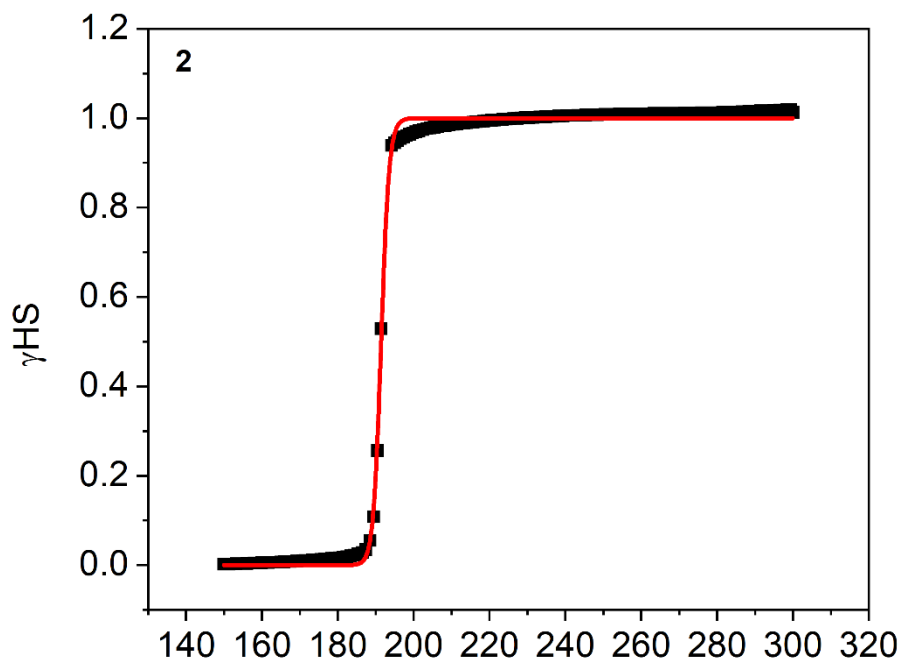

**Figure S5.** Heating curve of **2** obtained from a fit of magnetic susceptibility to the domain model. The performed calculations indicate the presence of  $\sim 17$  SCO centers per domain.

**Table S1.** Bond lengths for **1<sup>LS</sup>** (200 K).

|                     | Bond length (Å) |         | Bond length (Å) |         | Bond length (Å) |
|---------------------|-----------------|---------|-----------------|---------|-----------------|
| Ag2–Ag1             | 3.0191(8)       | N1–C1   | 1.141(8)        | N6–C7   | 1.322(10)       |
| Ag2–C4 <sup>1</sup> | 2.059(6)        | N2–C2   | 1.144(8)        | N6–C6   | 1.329(11)       |
| Ag2–C2 <sup>2</sup> | 2.038(7)        | N3–C3   | 1.141(8)        | C8–C7   | 1.375(10)       |
| Ag1–C1              | 2.070(6)        | N5–C8   | 1.336(8)        | C12–C11 | 1.383(9)        |
| Ag1–C3 <sup>3</sup> | 2.064(6)        | N5–C5   | 1.333(8)        | C12–C15 | 1.531(11)       |
| Fe1–N1              | 1.941(5)        | N4–C4   | 1.148(8)        | C5–C6   | 1.400(10)       |
| Fe1–N2              | 1.952(5)        | N7–C14  | 1.329(8)        | C15–C16 | 1.463(11)       |
| Fe1–N3              | 1.934(5)        | N7–C11  | 1.336(8)        | C6–C9   | 1.533(12)       |
| Fe1–N5              | 2.007(5)        | N8–C12  | 1.328(9)        | C9–C10B | 1.528(19)       |
| Fe1–N4              | 1.933(5)        | N8–C13  | 1.328(9)        | C9–C10A | 1.507(16)       |
| Fe1–N7              | 1.998(5)        | C14–C13 | 1.379(9)        |         |                 |

<sup>1</sup>1–x, 1–y, 1–z; <sup>2</sup>1/2–x, –1/2+y, 1/2–z; <sup>3</sup>+x, –1+y, +z

**Table S2.** Bond angles for **1<sup>LS</sup>** (200 K).

|                                      | Angle (°) |            | Angle (°) |                        | Angle (°) |
|--------------------------------------|-----------|------------|-----------|------------------------|-----------|
| C4 <sup>1</sup> –Ag2–Ag1             | 83.84(18) | N4–Fe1–N5  | 88.7(2)   | N8–C12–C11             | 120.5(6)  |
| C2 <sup>2</sup> –Ag2–Ag1             | 99.58(19) | N4–Fe1–N7  | 90.9(2)   | N8–C12–C15             | 118.9(7)  |
| C2 <sup>2</sup> –Ag2–C4 <sup>1</sup> | 175.4(3)  | N7–Fe1–N5  | 179.1(2)  | C11–C12–C15            | 120.6(7)  |
| C1–Ag1–Ag2                           | 79.62(18) | C1–N1–Fe1  | 178.2(5)  | N8–C13–C14             | 123.0(6)  |
| C3 <sup>3</sup> –Ag1–Ag2             | 93.94(18) | C2–N2–Fe1  | 172.0(5)  | N7–C11–C12             | 122.5(6)  |
| C3 <sup>3</sup> –Ag1–C1              | 170.4(2)  | N1–C1–Ag1  | 173.9(6)  | N5–C5–C6               | 122.6(7)  |
| N1–Fe1–N2                            | 90.0(2)   | C3–N3–Fe1  | 174.9(5)  | N6–C7–C8               | 123.4(8)  |
| N1–Fe1–N5                            | 91.0(2)   | C8–N5–Fe1  | 122.1(4)  | C16–C15–C12            | 110.3(8)  |
| N1–Fe1–N7                            | 89.80(19) | C5–N5–Fe1  | 122.8(5)  | N6–C6–C5               | 121.6(8)  |
| N2–Fe1–N5                            | 91.7(2)   | C5–N5–C8   | 114.9(6)  | N6–C6–C9               | 117.3(8)  |
| N2–Fe1–N7                            | 88.7(2)   | C4–N4–Fe1  | 173.8(5)  | C5–C6–C9               | 121.1(8)  |
| N3–Fe1–N1                            | 178.6(2)  | C14–N7–Fe1 | 121.1(4)  | C10B–C9–C6             | 109(2)    |
| N3–Fe1–N2                            | 89.5(2)   | C14–N7–C11 | 116.6(6)  | C10A–C9–C6             | 112.6(13) |
| N3–Fe1–N5                            | 90.3(2)   | C11–N7–Fe1 | 122.3(4)  | N4–C4–Ag2 <sup>1</sup> | 169.2(6)  |
| N3–Fe1–N7                            | 88.9(2)   | C12–N8–C13 | 116.7(6)  | N2–C2–Ag2 <sup>2</sup> | 175.7(6)  |
| N4–Fe1–N1                            | 89.9(2)   | N7–C14–C13 | 120.6(6)  | N3–C3–Ag1 <sup>5</sup> | 172.6(6)  |
| N4–Fe1–N2                            | 179.6(2)  | C7–N6–C6   | 115.5(7)  |                        |           |
| N4–Fe1–N3                            | 90.6(2)   | N5–C8–C7   | 122.1(7)  |                        |           |

<sup>1</sup>1–x, 1–y, 1–z; <sup>2</sup>1/2–x, –1/2+y, 1/2–z; <sup>3</sup>+x, –1+y, +z; <sup>4</sup>1/2–x, 1/2+y, 1/2–z; <sup>5</sup>+x, 1+y, +z

**Table S3.** Bond lengths for **1<sup>HS</sup>** (304 K).

|                     | Bond length (Å) |         | Bond length (Å) |         | Bond length (Å) |
|---------------------|-----------------|---------|-----------------|---------|-----------------|
| Ag1–Ag2             | 3.0724(9)       | N1–C1   | 1.139(8)        | N6–C6   | 1.313(12)       |
| Ag1–C3 <sup>1</sup> | 2.055(7)        | N7–C11  | 1.315(9)        | N4–C4   | 1.122(8)        |
| Ag1–C1              | 2.061(7)        | N7–C14  | 1.321(8)        | C14–C13 | 1.368(11)       |
| Fe1–N1              | 2.121(5)        | C3–N3   | 1.137(8)        | C12–C15 | 1.570(11)       |
| Fe1–N7              | 2.231(5)        | N8–C13  | 1.320(10)       | C5–C6   | 1.397(12)       |
| Fe1–N3              | 2.122(5)        | N8–C12  | 1.323(10)       | C6–C9   | 1.557(11)       |
| Fe1–N5              | 2.226(6)        | N5–C8   | 1.324(9)        | N2–C2   | 1.125(8)        |
| Fe1–N4              | 2.133(6)        | N5–C5   | 1.325(9)        | C15–C16 | 1.441(11)       |
| Fe1–N2              | 2.128(6)        | C8–C7   | 1.360(11)       | C9–C10B | 1.51(2)         |
| Ag2–C4 <sup>2</sup> | 2.063(7)        | C11–C12 | 1.369(10)       | C9–C10A | 1.509(18)       |
| Ag2–C2 <sup>3</sup> | 2.050(7)        | N6–C7   | 1.304(11)       |         |                 |

<sup>1</sup>+x, -1+y, +z; <sup>2</sup>1-x, 1-y, 1-z; <sup>3</sup>3/2-x, -1/2+y, 3/2-z

**Table S4.** Bond angles for **1<sup>HS</sup>** (304 K).

|                          | Angle (°)  |                                      | Angle (°) |                        | Angle (°) |
|--------------------------|------------|--------------------------------------|-----------|------------------------|-----------|
| C3 <sup>1</sup> –Ag1–Ag2 | 94.2(2)    | C4 <sup>2</sup> –Ag2–Ag1             | 87.0(2)   | C4–N4–Fe1              | 162.7(6)  |
| C3 <sup>1</sup> –Ag1–C1  | 170.3(3)   | C2 <sup>3</sup> –Ag2–Ag1             | 96.4(2)   | N7–C14–C13             | 121.4(7)  |
| C1–Ag1–Ag2               | 80.4(2)    | C2 <sup>3</sup> –Ag2–C4 <sup>2</sup> | 176.4(3)  | N8–C13–C14             | 123.6(8)  |
| N1–Fe1–N7                | 88.9(2)    | C1–N1–Fe1                            | 176.9(6)  | N8–C12–C11             | 121.5(7)  |
| N1–Fe1–N3                | 177.6(2)   | C11–N7–Fe1                           | 122.6(4)  | N8–C12–C15             | 118.7(8)  |
| N1–Fe1–N5                | 91.6(2)    | C11–N7–C14                           | 115.1(6)  | C11–C12–C15            | 119.7(9)  |
| N1–Fe1–N4                | 90.4(2)    | C14–N7–Fe1                           | 122.1(5)  | N5–C5–C6               | 121.2(8)  |
| N1–Fe1–N2                | 90.0(2)    | N3–C3–Ag1 <sup>4</sup>               | 174.8(7)  | N4–C4–Ag2 <sup>5</sup> | 173.4(7)  |
| N3–Fe1–N7                | 88.7(2)    | C3–N3–Fe1                            | 172.4(6)  | N6–C6–C5               | 122.2(8)  |
| N3–Fe1–N5                | 90.9(2)    | N1–C1–Ag1                            | 176.9(6)  | N6–C6–C9               | 118.4(10) |
| N3–Fe1–N4                | 89.6(2)    | C13–N8–C12                           | 114.7(7)  | C5–C6–C9               | 119.4(10) |
| N3–Fe1–N2                | 89.9(2)    | C8–N5–Fe1                            | 121.9(5)  | C2–N2–Fe1              | 166.4(7)  |
| N5–Fe1–N7                | 179.52(19) | C8–N5–C5                             | 115.7(7)  | N2–C2–Ag2 <sup>5</sup> | 175.8(7)  |
| N4–Fe1–N7                | 91.0(2)    | C5–N5–Fe1                            | 122.4(5)  | C16–C15–C12            | 109.7(9)  |
| N4–Fe1–N5                | 88.9(2)    | N5–C8–C7                             | 121.8(8)  | C10B–C9–C6             | 105(3)    |
| N2–Fe1–N7                | 87.2(2)    | N7–C11–C12                           | 123.5(7)  | C10A–C9–C6             | 115.1(17) |
| N2–Fe1–N5                | 92.9(2)    | C7–N6–C6                             | 115.3(8)  |                        |           |
| N2–Fe1–N4                | 178.2(2)   | N6–C7–C8                             | 123.8(9)  |                        |           |

<sup>1</sup>+x, -1+y, +z; <sup>2</sup>1-x, 1-y, 1-z; <sup>3</sup>3/2-x, -1/2+y, 3/2-z; <sup>4</sup>+x, 1+y, +z; <sup>5</sup>3/2-x, 1/2+y, 3/2-z

**Table S5.** Bond lengths for **2<sup>LS</sup>** (173 K).

|                      | Bond length (Å) |                     | Bond length (Å) |                    | Bond length (Å) |
|----------------------|-----------------|---------------------|-----------------|--------------------|-----------------|
| Ag2–C2               | 2.072(3)        | Fe1–N4              | 1.989(3)        | C3–C3 <sup>3</sup> | 1.142(7)        |
| Ag2–C3               | 2.098(3)        | Fe1–N4 <sup>2</sup> | 1.989(3)        | C5–C4              | 1.400(5)        |
| Ag2–N3               | 2.098(3)        | N1–C1               | 1.142(4)        | C5–C8              | 1.512(4)        |
| Ag2–Ag1 <sup>1</sup> | 3.2185(4)       | N2–C2               | 1.145(5)        | C7–C6              | 1.384(5)        |
| Fe1–N1               | 1.954(3)        | N4–C7               | 1.353(5)        | C1–Ag1             | 2.077(3)        |
| Fe1–N1 <sup>2</sup>  | 1.954(3)        | N4–C4               | 1.348(4)        | C8–C9              | 1.526(5)        |
| Fe1–N2               | 1.949(3)        | N5–C5               | 1.332(5)        |                    |                 |
| Fe1–N2 <sup>2</sup>  | 1.949(3)        | N5–C6               | 1.319(4)        |                    |                 |

<sup>1</sup>+x, 1+y, +z; <sup>2</sup>1-x, -1-y, -z; <sup>3</sup>-x, -y, -1-z

**Table S6.** Bond angles for **2<sup>LS</sup>** (173 K).

|                                      | Angle (°)  |                                      | Angle (°)  |                                        | Angle (°)  |
|--------------------------------------|------------|--------------------------------------|------------|----------------------------------------|------------|
| C2–Ag2–C3                            | 178.44(14) | N2–Fe1–N2 <sup>2</sup>               | 180.00(13) | N5–C5–C4                               | 120.6(3)   |
| C2–Ag2–N3                            | 178.44(14) | N2 <sup>2</sup> –Fe1–N4 <sup>2</sup> | 89.43(12)  | N5–C5–C8                               | 117.5(3)   |
| C2–Ag2–Ag1 <sup>1</sup>              | 80.26(10)  | N2 <sup>2</sup> –Fe1–N4              | 90.57(12)  | C4–C5–C8                               | 121.9(3)   |
| C3–Ag2–Ag1 <sup>1</sup>              | 101.29(10) | N2–Fe1–N4                            | 89.43(12)  | N4–C7–C6                               | 121.2(3)   |
| N3–Ag2–Ag1 <sup>1</sup>              | 101.29(10) | N2–Fe1–N4 <sup>2</sup>               | 90.57(12)  | N4–C4–C5                               | 121.9(3)   |
| N1–Fe1–N1 <sup>2</sup>               | 180        | N4 <sup>2</sup> –Fe1–N4              | 180        | N1–C1–Ag1                              | 172.1(3)   |
| N1–Fe1–N4                            | 87.74(11)  | C1–N1–Fe1                            | 170.5(3)   | N5–C6–C7                               | 122.4(3)   |
| N1 <sup>2</sup> –Fe1–N4              | 92.26(11)  | C2–N2–Fe1                            | 175.0(3)   | C5–C8–C9                               | 112.0(3)   |
| N1 <sup>2</sup> –Fe1–N4 <sup>2</sup> | 87.74(11)  | C7–N4–Fe1                            | 120.3(2)   | Ag2 <sup>4</sup> –Ag1–Ag2 <sup>5</sup> | 180        |
| N1–Fe1–N4 <sup>2</sup>               | 92.26(11)  | C4–N4–Fe1                            | 123.5(3)   | C1–Ag1–Ag2 <sup>5</sup>                | 104.56(10) |
| N2–Fe1–N1 <sup>2</sup>               | 88.41(11)  | C4–N4–C7                             | 116.0(3)   | C1 <sup>6</sup> –Ag1–Ag2 <sup>4</sup>  | 104.56(10) |
| N2–Fe1–N1                            | 91.59(11)  | N2–C2–Ag2                            | 165.2(3)   | C1–Ag1–Ag2 <sup>4</sup>                | 75.44(10)  |
| N2 <sup>2</sup> –Fe1–N1              | 88.41(11)  | C6–N5–C5                             | 117.9(3)   | C1 <sup>6</sup> –Ag1–Ag2 <sup>5</sup>  | 75.44(10)  |
| N2 <sup>2</sup> –Fe1–N1 <sup>2</sup> | 91.59(11)  | C3 <sup>3</sup> –C3–Ag2              | 174.1(5)   | C1–Ag1–C1 <sup>6</sup>                 | 180        |

<sup>1</sup>+x, 1+y, +z; <sup>2</sup>1-x, -1-y, -z; <sup>3</sup>-x, -y, -1-z; <sup>4</sup>+x, -1+y, +z; <sup>5</sup>-x, -1-y, -z; <sup>6</sup>-x, -2-y, -z

**Table S7.** Bond lengths for **2<sup>HS</sup>** (296 K).

|                     | Bond length (Å) |                     | Bond length (Å) |       | Bond length (Å) |
|---------------------|-----------------|---------------------|-----------------|-------|-----------------|
| Ag2–C2              | 2.078(3)        | Fe1–N4 <sup>2</sup> | 2.241(2)        | C5–C4 | 1.400(4)        |
| Ag2–C3              | 2.104(3)        | Fe1–N1              | 2.172(2)        | C5–N5 | 1.343(4)        |
| Ag2–N3              | 2.104(3)        | Fe1–N1 <sup>2</sup> | 2.172(2)        | C5–C8 | 1.511(4)        |
| Ag1–C1 <sup>1</sup> | 2.079(3)        | C2–N2               | 1.135(4)        | C7–C6 | 1.389(4)        |
| Ag1–C1              | 2.079(3)        | C3–C3 <sup>3</sup>  | 1.132(6)        | C6–N5 | 1.337(4)        |
| Fe1–N2              | 2.165(2)        | N4–C4               | 1.341(3)        | C8–C9 | 1.525(5)        |
| Fe1–N2 <sup>2</sup> | 2.166(2)        | N4–C7               | 1.342(4)        |       |                 |
| Fe1–N4              | 2.241(2)        | N1–C1               | 1.141(4)        |       |                 |

<sup>1</sup>-x, -y, 2-z; <sup>2</sup>1-x, 1-y, 2-z; <sup>3</sup>-x, 2-y, 1-z

**Table S8.** Bond angles for **2<sup>HS</sup>** (296 K).

|                                      | Angle (°)  |                                      | Angle (°)  |           | Angle (°) |
|--------------------------------------|------------|--------------------------------------|------------|-----------|-----------|
| C2–Ag2–C3                            | 179.12(13) | N4–Fe1–N4 <sup>2</sup>               | 180        | C1–N1–Fe1 | 164.6(2)  |
| C2–Ag2–N3                            | 179.12(13) | N1 <sup>2</sup> –Fe1–N4 <sup>2</sup> | 87.19(9)   | N1–C1–Ag1 | 175.3(3)  |
| C1–Ag1–C1 <sup>1</sup>               | 180        | N1 <sup>2</sup> –Fe1–N4              | 92.81(9)   | C4–C5–C8  | 122.5(2)  |
| N2–Fe1–N2 <sup>2</sup>               | 180.00(10) | N1–Fe1–N4                            | 87.19(9)   | N5–C5–C4  | 120.2(2)  |
| N2 <sup>2</sup> –Fe1–N4              | 91.13(9)   | N1–Fe1–N4 <sup>2</sup>               | 92.81(9)   | N5–C5–C8  | 117.2(2)  |
| N2–Fe1–N4                            | 88.87(9)   | N1–Fe1–N1 <sup>2</sup>               | 180        | N4–C4–C5  | 122.3(2)  |
| N2 <sup>2</sup> –Fe1–N4 <sup>2</sup> | 88.87(9)   | N2–C2–Ag2                            | 168.1(2)   | N4–C7–C6  | 120.5(3)  |
| N2–Fe1–N4 <sup>2</sup>               | 91.13(9)   | C3 <sup>3</sup> –C3–Ag2              | 174.0(4)   | N5–C6–C7  | 122.7(3)  |
| N2–Fe1–N1 <sup>2</sup>               | 90.02(10)  | C2–N2–Fe1                            | 168.1(2)   | C6–N5–C5  | 117.1(2)  |
| N2 <sup>2</sup> –Fe1–N1              | 90.02(10)  | C4–N4–Fe1                            | 124.25(18) | C5–C8–C9  | 112.3(2)  |
| N2 <sup>2</sup> –Fe1–N1 <sup>2</sup> | 89.98(10)  | C4–N4–C7                             | 117.0(2)   |           |           |
| N2–Fe1–N1                            | 89.98(10)  | C7–N4–Fe1                            | 118.56(17) |           |           |

<sup>1</sup>–x, –y, 2–z; <sup>2</sup>1–x, 1–y, 2–z; <sup>3</sup>–x, 2–y, 1–z
